# Supplementary material for: Superior electric double layer capacitors using micro- and mesoporous silicon carbide sphere
Source: Royal Society of Chemistry journal article supplement (doi:10.1039/c4ta07110g), 2015-01-01
Supplement: c4ta07110g1.pdf [file c4ta07110g1.pdf]

## Supplementary Information

# Superior Electric Double Layer Capacitors Using Micro- and Mesoporous Silicon Carbide Sphere

By Myeongjin Kim, Ilgeun Oh and Jooheon Kim\*

\*Corresponding author: Prof. Jooheon Kim

School of Chemical Engineering & Materials Science,

Chung-Ang University, Seoul 156-756, Korea

E-mail: jooheonkim@cau.ac.kr

### 1. Low-magnification FE-SEM image for MMPSiC

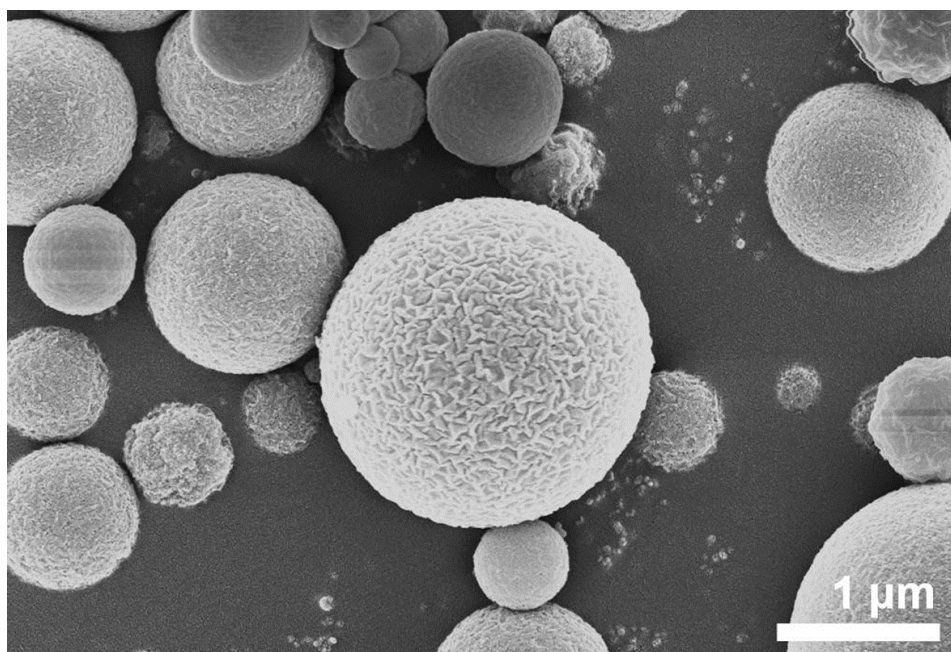

**Figure S1.** Low-magnification FE-SEM image of MMPSiC.

## 2. XRD analysis for silicon nanoparticle

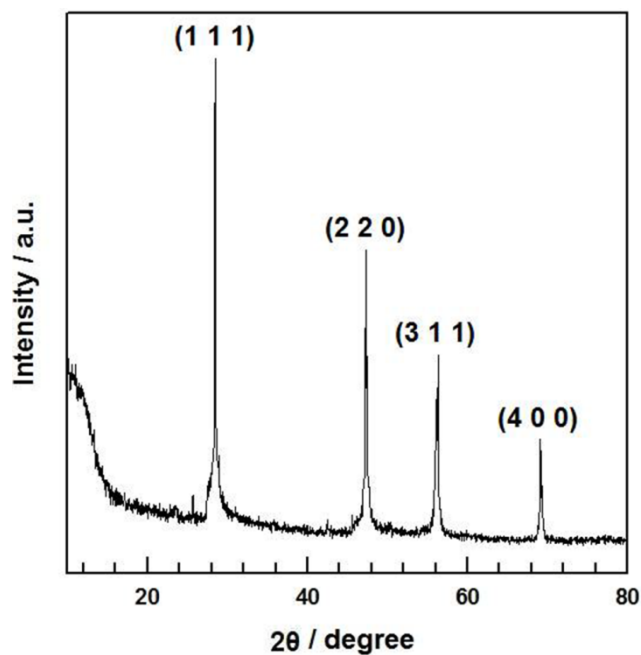

Figure S2. XRD pattern of silicon nanoparticle.

## 3. XPS analysis for MMPSiC

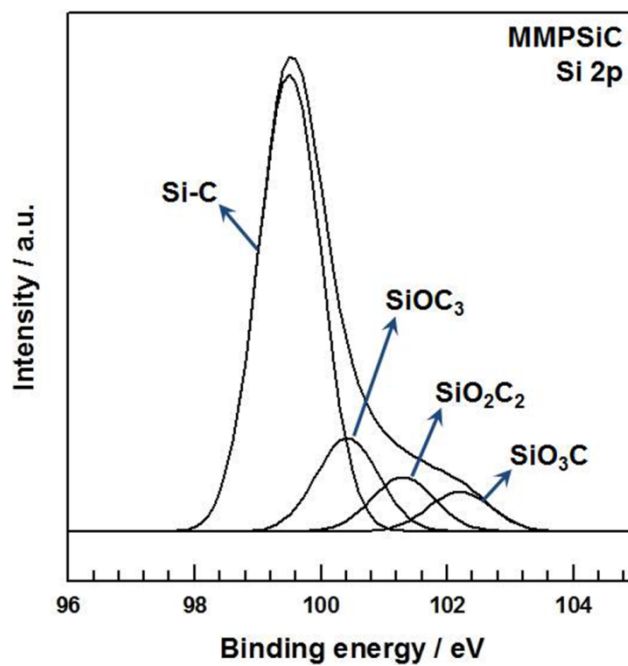

Figure S3(a). XPS Si 2p spectra of MMPSiC.

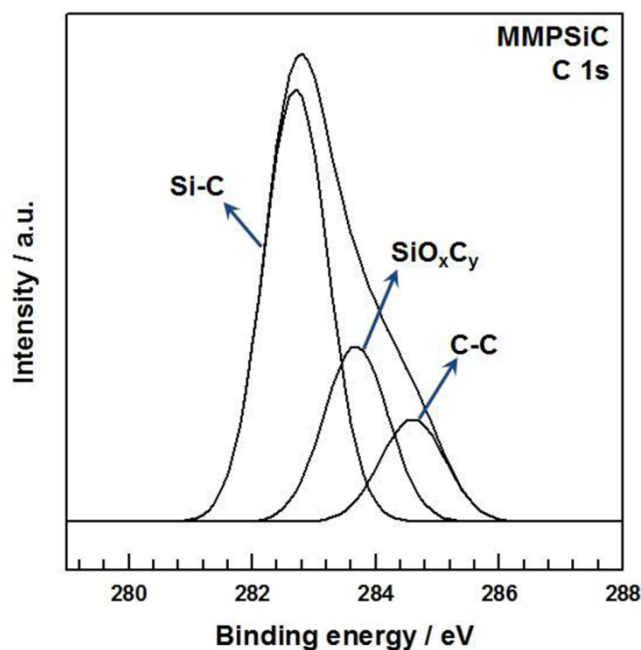

**Figure S3(b).** XPS C 1s spectra of MMPSiC.

**Table S1.** The Si 2p peak position and the relative atomic percentages of various functional groups in MMPSiC.

|        | Fitting of the Si 2p peak Binding energy [eV]<br>(relative atomic percentage [%]) |                   |                                 |                    |
|--------|-----------------------------------------------------------------------------------|-------------------|---------------------------------|--------------------|
|        | Si-C                                                                              | SiOC <sub>3</sub> | SiO <sub>2</sub> C <sub>2</sub> | SiO <sub>3</sub> C |
| MMPSiC | 99.51<br>(70.88)                                                                  | 100.42<br>(14.45) | 101.31<br>(8.45)                | 102.2<br>(6.22)    |

**Table S2.** The C 1s peak position and the relative atomic percentages of various functional groups in MMPSiC.

|        | Fitting of the C 1s peak Binding energy [eV]<br>(relative atomic percentage [%]) |                                 |                   |
|--------|----------------------------------------------------------------------------------|---------------------------------|-------------------|
|        | Si-C                                                                             | SiO <sub>x</sub> C <sub>y</sub> | C-C               |
| MMPSiC | 282.72<br>(60.87)                                                                | 283.68<br>(24.69)               | 284.61<br>(14.44) |

4. Electrochemical performance of MMPSiC electrode by three-electrode configuration in 1M  $\text{Na}_2\text{SO}_4$  aqueous electrolyte.

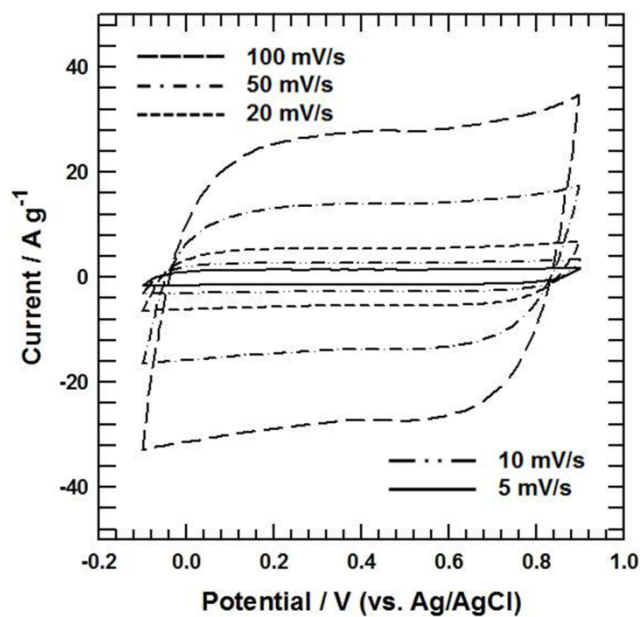

Figure S4(a). CV curves of MMPSiC electrode measured as different scan rates of 5, 10, 20, 50 and 100  $\text{mV s}^{-1}$ .

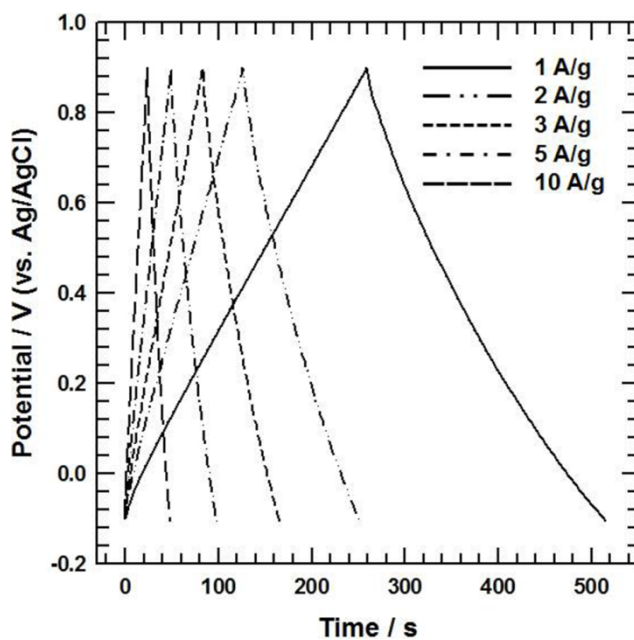

Figure S4(b). Galvanostatic charge/discharge curves of MMPSiC electrode measured as different current densities of 1, 2, 3, 5 and 10  $\text{A g}^{-1}$ .

5. Electrochemical performance of two-electrode supercapacitors based on MMPSiC electrodes with 1M Na<sub>2</sub>SO<sub>4</sub> aqueous electrolyte.

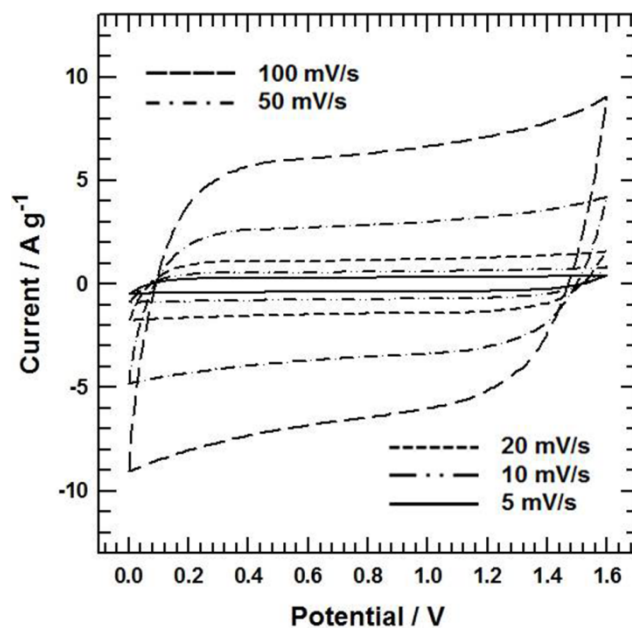

Figure S5(a). CV curves of two-electrode supercapacitor measured as different scan rates of 5, 10, 20, 50 and 100 mV s<sup>-1</sup>.

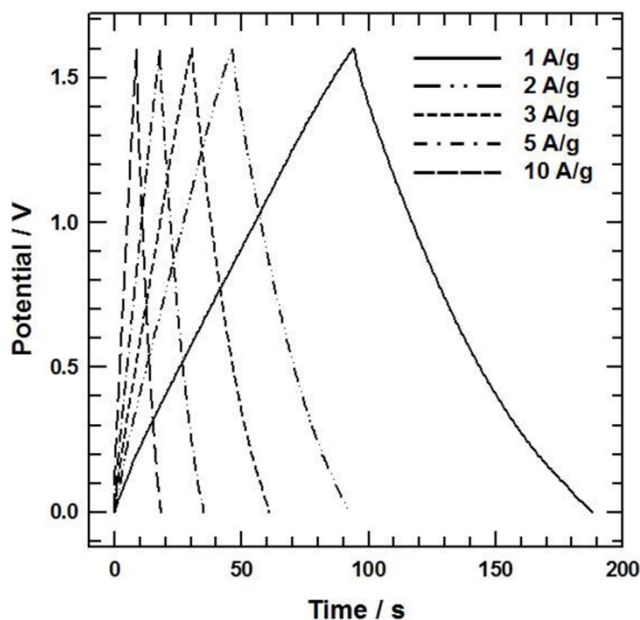

Figure S5(b). Galvanostatic charge/discharge curves of two-electrode supercapacitor measured as different current densities of 1, 2, 3, 5 and 10 A g<sup>-1</sup>.

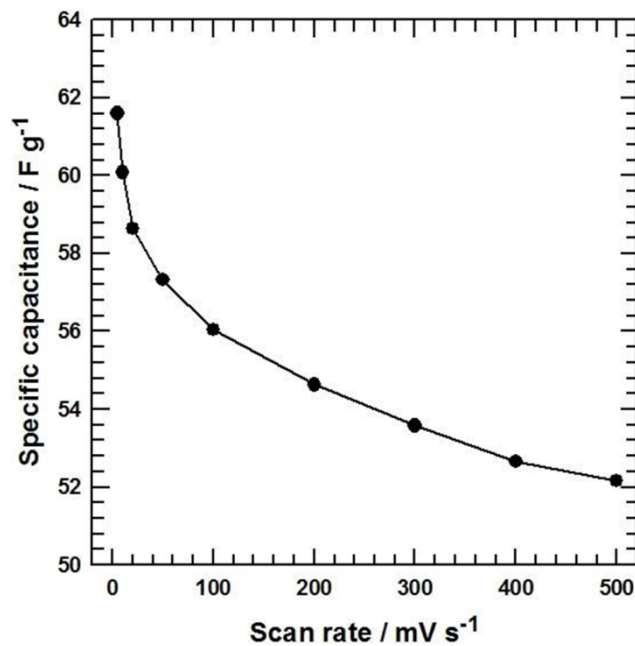

**Figure S5(c).** Specific capacitance of two-electrode supercapacitor at different scan rates.

**6. Electrochemical performance of two-electrode supercapacitors based on MMPSiC electrodes with 3-ethyl-3-methylimidazolium bis(trifluorosulfonyl)imide, [EMIM][TFSI] ionic liquid electrolyte.**

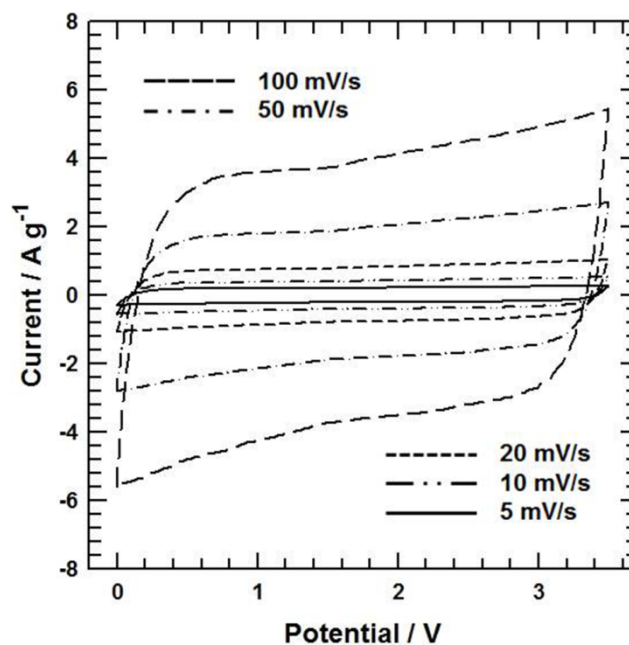

**Figure S6(a).** CV curves of two-electrode supercapacitor measured at different scan rates of 5, 10, 20, 50 and 100 mV s<sup>-1</sup>.

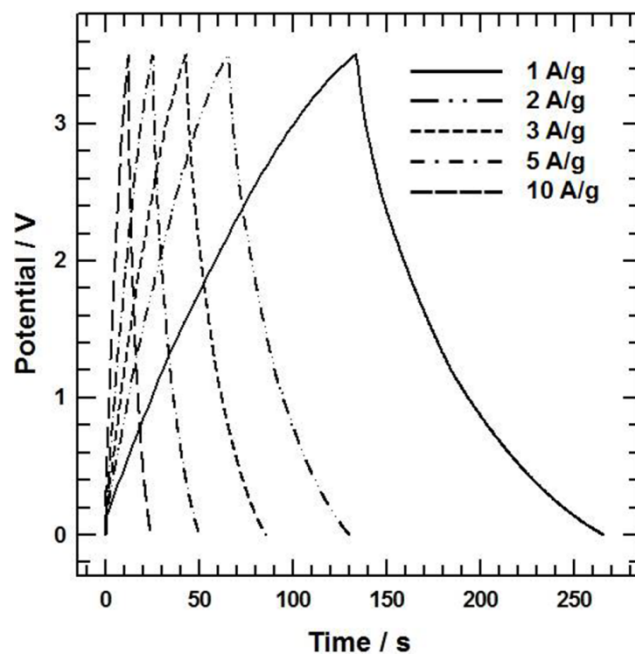

**Figure S6(b).** Galvanostatic charge/discharge curves of two-electrode supercapacitor measured as different current densities of 1, 2, 3, 5 and 10 A g<sup>-1</sup>.

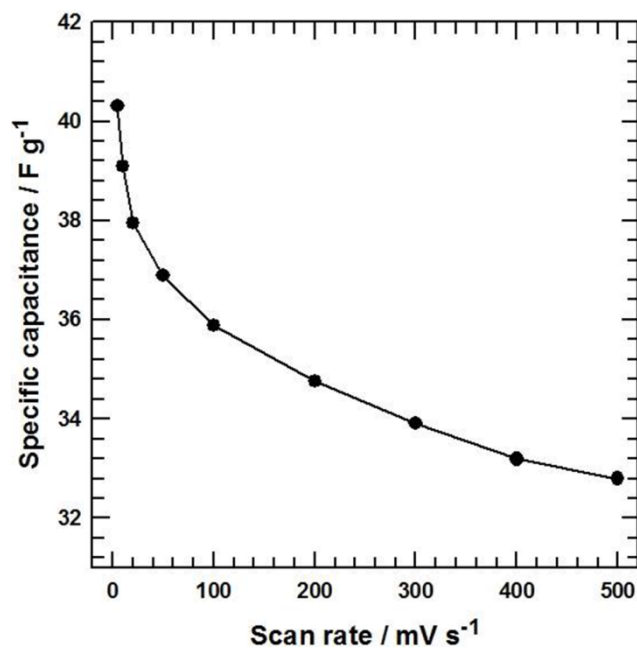

**Figure S6(c).** Specific capacitance of two-electrode supercapacitor at different scan rates.

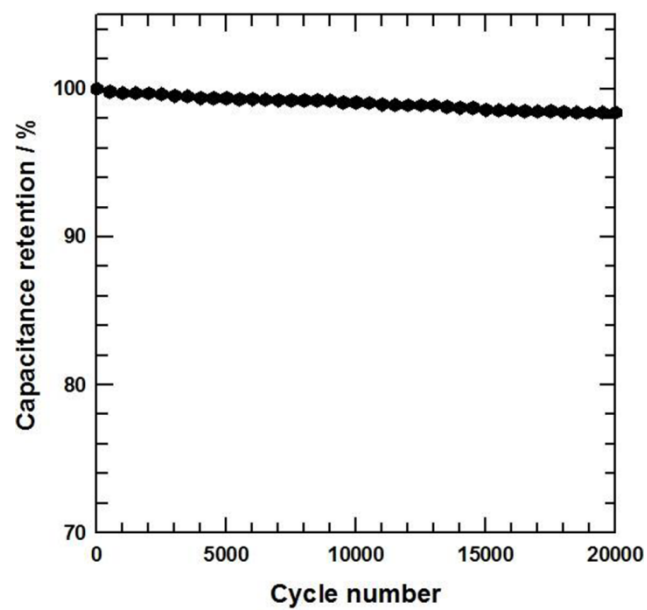

**Figure S6(d).** Cycling stability of two-electrode supercapacitor measured at a current density of 10 A

$\text{g}^{-1}$ .
